# Supplementary material
Source: publisher site journal article supplement (https://www.dovepress.com/article/447289)
Supplement: Supplementary file 1 [file get_supplementary_file.php]

Supplementary Material: Results of determination of glucose level in blood of rats against the background of administration of investigated substances

| **Substance** | **Group** | **Rats No.** |  | **initial** | **1h** | **2h** | **3h** | **24h** |  | **t, stud** |
| --- | --- | --- | --- | --- | --- | --- | --- | --- | --- | --- |
| (IVa-f) | 1 | 1 |  | 4,2 | 4,4 | 4,1 | 5,2 | 4,1 |  |  |
|  |  | 2 |  | 4,4 | 4 | 4,2 | 4,1 | 5 |  |  |
|  |  | 3 |  | 4,5 | 4,2 | 4,1 | 4,2 | 3,9 |  |  |
|  |  | 4 |  | 4,1 | 4,9 | 4,5 | 4,2 | 4,7 |  |  |
|  |  | 5 |  | 3,9 | 5,1 | 5,1 | 4,1 | 4,3 |  |  |
|  |  |  |  | 4,22 | 4,52 | 4,4 | 4,36 | 4,4 |  |  |
|  |  |  |  | 0,24 | 0,47 | 0,42 | 0,47 | 0,45 |  |  |
|  | | | | | | | | | | |
|  | 2 | 1 |  | 4,8 | 4,9 | 4 | 4,7 | 4,6 |  |  |
|  |  | 2 |  | 4,4 | 4,7 | 4,7 | 3,6 | 4,9 |  |  |
|  |  | 3 |  | 4,1 | 4,2 | 4,4 | 4,1 | 4,3 |  |  |
|  |  | 4 |  | 4,2 | 5,1 | 4,2 | 4,7 | 5 |  |  |
|  |  | 5 |  | 3,9 | 5,6 | 4,2 | 4,1 | 4,1 |  |  |
|  |  |  |  | 4,28 | 4,9 | 4,3 | 4,24 | 4,58 |  |  |
|  |  |  |  | 0,34 | 0,51 | 0,26 | 0,47 | 0,38 |  |  |
|  | | | | | | | | | | |
|  | 3 | 1 |  | 4,6 | 4,9 | 4,3 | 4,1 | 4,4 |  |  |
|  |  | 2 |  | 4,9 | 4,5 | 4,4 | 4,2 | 4,7 |  |  |
|  |  | 3 |  | 5,1 | 4,2 | 4,3 | 4,8 | 4,1 |  |  |
|  |  | 4 |  | 5,2 | 4,6 | 4,2 | 4,6 | 4,3 |  |  |
|  |  | 5 |  | 3,6 | 4,8 | 4,9 | 4,3 | 5,4 |  |  |
|  |  |  |  | 4,68 | 4,6 | 4,42 | 4,4 | 4,58 |  |  |
|  |  |  |  | 0,65 | 0,27 | 0,28 | 0,29 | 0,51 |  |  |
|  | | | | | | | | | | |
|  | 4 | 1 |  | 5,1 | 4,3 | 4,4 | 4,4 | 4,4 |  |  |
|  |  | 2 |  | 4,1 | 4,2 | 4,1 | 5,2 | 4,2 |  |  |
|  |  | 3 |  | 3,8 | 5,2 | 4,3 | 4,6 | 5,2 |  |  |
|  |  | 4 |  | 4,8 | 4,7 | 4,4 | 4,3 | 3,8 |  |  |
|  |  | 5 |  | 3,9 | 4,7 | 5,5 | 4,2 | 4,40 |  |  |
|  |  |  |  | 4,34 | 4,62 | 4,54 | 4,54 | 4,4 |  |  |
|  |  |  |  | 0,58 | 0,40 | 0,55 | 0,40 | 0,51 |  |  |
|  | | | | | | | | | | |
|  | 5 | 1 |  | 4,6 | 4,9 | 4 | 5,1 | 4,8 |  |  |
|  |  | 2 |  | 5,1 | 4,4 | 4,9 | 5,1 | 4,4 |  |  |
|  |  | 3 |  | 4,6 | 4,2 | 4,3 | 4,8 | 3,6 |  |  |
|  |  | 4 |  | 4,8 | 4,9 | 4,3 | 4,8 | 4,9 |  |  |
|  |  | 5 |  | 4,3 | 4,9 | 4,9 | 4,9 | 4,1 |  |  |
|  |  |  |  | 4,68 | 4,66 | 4,48 | 4,94 | 4,36 |  |  |
|  |  |  |  | 0,29 | 0,34 | 0,40 | 0,15 | 0,53 |  |  |
|  | | | | | | | | | | |
|  | 6 | 1 |  | 5,1 | 5,1 | 5 | 4,9 | 4,6 |  |  |
|  |  | 2 |  | 4,1 | 4 | 4,6 | 4,8 | 4,8 |  |  |
|  |  | 3 |  | 5,1 | 4,1 | 4,6 | 4,9 | 5,2 |  |  |
|  |  | 4 |  | 5,7 | 5,2 | 5 | 4,6 | 4,9 |  |  |
|  |  | 5 |  | 4,2 | 4,2 | 4,3 | 4,3 | 4,1 |  |  |
|  |  |  |  | 4,84 | 4,52 | 4,7 | 4,7 | 4,72 |  |  |
|  |  |  |  | 0,68 | 0,58 | 0,30 | 0,25 | 0,41 |  |  |
|  | | | | | | | | | | |
|  | 7 | 1 |  | 4,8 | 4,7 | 4,7 | 4,8 | 4,8 |  |  |
|  |  | 2 |  | 3,9 | 4,1 | 4,1 | 4,3 | 4,3 |  |  |
|  |  | 3 |  | 4,2 | 4,3 | 4,9 | 4,7 | 4,9 |  |  |
|  |  | 4 |  | 4 | 4,1 | 4 | 3,9 | 4 |  |  |
|  |  | 5 |  | 5,1 | 4,8 | 4,8 | 4,9 | 4,9 |  |  |
|  |  |  |  | 4,4 | 4,4 | 4,5 | 4,52 | 4,58 |  |  |
|  |  |  |  | 0,52 | 0,33 | 0,42 | 0,41 | 0,41 |  |  |
|  |  |  |  |  |  |  |  |  |  | 4,26898E-05 |
|  | | | | | | | | | | |
|  | 8 | 1 |  | 18,6 | 18,6 | 18,9 | 19,2 | 19 |  |  |
|  |  | 2 |  | 16,5 | 16,4 | 16,9 | 18 | 19,3 |  |  |
|  |  | 3 |  | 18,3 | 18,2 | 18,2 | 19,4 | 19,9 |  |  |
|  |  | 4 |  | 16,3 | 16,9 | 16 | 15,4 | 15,8 |  |  |
|  |  | 5 |  | 13,9 | 15,2 | 15,8 | 15,9 | 16,6 |  |  |
|  |  |  |  | 16,72 | 17,06 | 17,16 | 17,58 | 18,12 |  |  |
|  |  |  |  | 1,88 | 1,38 | 1,36 | 1,85 | 1,80 |  |  |
|  | | | | | | | | | | |
| a | 9 | 1 |  | 11,2 | 11 | 9,1 | 7,7 | 8 |  |  |
|  |  | 2 |  | 12,6 | 11 | 6,4 | 7 | 8,2 |  |  |
|  |  | 3 |  | 12,5 | 11,4 | 10,3 | 9,8 | 7,9 |  |  |
|  |  | 4 |  | 13,6 | 11 | 9,2 | 9 | 8,6 |  |  |
|  |  | 5 |  | 11,9 | 10,9 | 9,7 | 7,9 | 8,8 |  |  |
|  |  |  |  | 12,36 | 11,06 | 8,94 | 8,28 | 8,3 |  |  |
|  |  |  |  | 0,89 | 0,19 | 1,50 | 1,11 | 0,39 |  |  |
|  |  |  |  |  |  |  |  |  |  | 0,000171402 |
|  | | | | | | | | | | |
| b | 10 | 1 |  | 16,3 | 16,1 | 17,7 | 14,9 | 15,5 |  |  |
|  |  | 2 |  | 17,7 | 17,9 | 15,3 | 14,2 | 18,6 |  |  |
|  |  | 3 |  | 17,7 | 17 | 17 | 16,9 | 14,3 |  |  |
|  |  | 4 |  | 14,2 | 13,9 | 14 | 13,2 | 16,7 |  |  |
|  |  | 5 |  | 14,2 | 14,8 | 14,5 | 14,7 | 18,6 |  |  |
|  |  |  |  | 16,02 | 15,94 | 15,7 | 14,78 | 16,74 |  |  |
|  |  |  |  | 1,76 | 1,62 | 1,60 | 1,36 | 1,90 |  |  |
|  |  |  |  |  |  |  |  |  |  | 0,17780342 |
|  | | | | | | | | | | |
| c | 11 | 1 |  | 14,9 | 14,5 | 13,2 | 11,9 | 14,7 |  |  |
|  |  | 2 |  | 15,8 | 16,1 | 16,7 | 17,1 | 18,3 |  |  |
|  |  | 3 |  | 17,2 | 15,3 | 14,1 | 19,1 | 15,1 |  |  |
|  |  | 4 |  | 12,3 | 13,7 | 16,5 | 16 | 15,2 |  |  |
|  |  | 5 |  | 11,6 | 13,7 | 14,8 | 17,3 | 17 |  |  |
|  |  |  |  | 14,36 | 14,66 | 15,06 | 16,28 | 16,06 |  |  |
|  |  |  |  | 2,36 | 1,04 | 1,52 | 2,69 | 1,53 |  |  |
|  |  |  |  |  |  |  |  |  |  | 0,088638522 |
|  |  |  |  |  |  |  |  |  |  |  |
|  | | | | | | | | | | |
| d | 12 | 1 |  | 11,9 | 11 | 10,1 | 8,5 | 7,6 |  |  |
|  |  | 2 |  | 11,7 | 10,4 | 10 | 9,4 | 9 |  |  |
|  |  | 3 |  | 12,2 | 11,7 | 10,2 | 10 | 9,5 |  |  |
|  |  | 4 |  | 11,1 | 10 | 9,5 | 9 | 8,6 |  |  |
|  |  | 5 |  | 12,8 | 11,1 | 9,4 | 8,6 | 8 |  |  |
|  |  |  |  | 11,94 | 10,84 | 9,84 | 9,1 | 8,54 |  |  |
|  |  |  |  | 0,63 | 0,66 | 0,36 | 0,62 | 0,76 |  |  |
|  |  |  |  |  |  |  |  |  |  | 7,08021E-05 |
|  | | | | | | | | | | |
| e | 13 | 1 |  | 11,3 | 13,9 | 14,6 | 17,1 | 17,9 |  |  |
|  |  | 2 |  | 14,7 | 16 | 16,3 | 16,7 | 19,5 |  |  |
|  |  | 3 |  | 11,2 | 14,6 | 15,3 | 17,4 | 18,2 |  |  |
|  |  | 4 |  | 12,7 | 12,4 | 15,7 | 16,4 | 16,9 |  |  |
|  |  | 5 |  | 12,9 | 14,1 | 14 | 15,4 | 16 |  |  |
|  |  |  |  | 12,56 | 14,2 | 15,18 | 16,6 | 17,7 |  |  |
|  |  |  |  | 1,43 | 1,30 | 0,90 | 0,77 | 1,33 |  |  |
|  |  |  |  |  |  |  |  |  |  | 0,687133708 |
|  | | | | | | | | | | |
| f | 14 | 1 |  | 12,7 | 6,6 | 7,2 | 8 | 7,9 |  |  |
|  |  | 2 |  | 11,3 | 8 | 7,6 | 7,9 | 7,7 |  |  |
|  |  | 3 |  | 13,4 | 11,9 | 8,6 | 8,3 | 7,6 |  |  |
|  |  | 4 |  | 12,1 | 10,2 | 9,5 | 9 | 8,5 |  |  |
|  |  | 5 |  | 11,6 | 9 | 7,7 | 7,6 | 7,4 |  |  |
|  |  |  |  | 12,22 | 9,14 | 8,12 | 8,16 | 7,82 |  |  |
|  |  |  |  | 0,85 | 2,03 | 0,93 | 0,53 | 0,42 |  |  |
|  |  |  |  |  |  |  |  |  |  | 0,000127207 |
